# Supplementary material for: In situhydrothermal synthesis of polar second-order nonlinear optical selenate Na5(SeO4)(HSeO4)3(H2O)2
Source: Royal Society of Chemistry journal article supplement (doi:10.1039/d1qi00373a), 2021-01-01
Supplement: d1qi00373a1.pdf [file d1qi00373a1.pdf]

## Supporting Information

### **In Situ Hydrothermal Synthesis of Polar Second-Order Nonlinear Optical Selenate $\text{Na}_5(\text{SeO}_4)(\text{HSeO}_4)_3(\text{H}_2\text{O})_2$**

Chao Wu,<sup>a,δ</sup> Xingxing Jiang,<sup>b,δ</sup> Lin Lin,<sup>a</sup> Tianhui Wu,<sup>a</sup> Zheshuai Lin,<sup>b</sup> Zhipeng

Huang,<sup>a</sup> Mark G. Humphrey,<sup>c</sup> and Chi Zhang<sup>\*,a</sup>

<sup>a</sup> China-Australia Joint Research Center for Functional Molecular Materials, School of Chemical Science and Engineering, Tongji University, Shanghai 200092, China.

<sup>b</sup> Key Lab of Functional Crystals and Laser Technology, Technical Institute of Physics and Chemistry, Chinese Academy of Sciences, Beijing 100190, China.

<sup>c</sup> Research School of Chemistry, Australian National University, Canberra, Australian Capital Territory 2601, Australia.

## Theoretical Calculations

**Table S1.** Selected bond distances ( $\text{\AA}$ ) and angles (deg) for  $\text{Na}_5(\text{SeO}_4)(\text{HSeO}_4)_3(\text{H}_2\text{O})_2$ .

**Table S2.** Atomic coordinates ( $\times 10^4$ ) and equivalent isotropic displacement parameters ( $\text{\AA}^2 \times 10^3$ ) of  $\text{Na}_5(\text{SeO}_4)(\text{HSeO}_4)_3(\text{H}_2\text{O})_2$ .  $U(\text{eq})$  is defined as one third of the trace of the orthogonalized  $U_{ij}$  tensor, and the bond valence sum for each atom in asymmetric unit.

**Table S3.** Hydrogen-bonding interactions for  $\text{Na}_5(\text{SeO}_4)(\text{HSeO}_4)_3(\text{H}_2\text{O})_2$ .

**Figure S1.** Experimental and simulated powder X-ray diffraction patterns of  $\text{Na}_5(\text{SeO}_4)(\text{HSeO}_4)_3(\text{H}_2\text{O})_2$ .

**Figure S2.** Coordination environments of the Na atoms in  $\text{Na}_5(\text{SeO}_4)(\text{HSeO}_4)_3(\text{H}_2\text{O})_2$ .

**Figure S3.** IR spectrum of  $\text{Na}_5(\text{SeO}_4)(\text{HSeO}_4)_3(\text{H}_2\text{O})_2$ .

**Figure S4.** Thermogravimetric analyses of  $\text{Na}_5(\text{SeO}_4)(\text{HSeO}_4)_3(\text{H}_2\text{O})_2$  under a  $\text{N}_2$  atmosphere.

**Figure S5.** Calculated refractive index and phase-matching ability in  $\text{Na}_5(\text{SeO}_4)(\text{HSeO}_4)_3(\text{H}_2\text{O})_2$ .

**Figure S6.** Energy dispersive spectroscopy result of  $\text{Na}_5(\text{SeO}_4)(\text{HSeO}_4)_3(\text{H}_2\text{O})_2$ .

**Theoretical Calculations:** The bandgap calculated by standard DFT is inconsistent with the experimental data due to the discontinuity in the exchange-correlation functional, so a scissor operator<sup>S1</sup> was used to shift the conduction band upward to agree with the measured value. Based on the scissor-operator-corrected electronic band structure, the imaginary part of the dielectric function from the electronic transition between the valence band (VB) and the conduction band (CB) can be calculated. The real part of the dielectric function, i.e., the refractive indices, can be determined by a Kramers-Kronig transform.<sup>S2</sup> The anisotropic SHG coefficients were calculated by the program developed by our group.<sup>S3,S4</sup> In the SHG-weighted electronic cloud calculations, the probability densities of all occupied (valence) or unoccupied (conduction) states projected onto the real space are multiplied by a weighting factor that is related to the contribution to the SHG efficiency by the virtual electron (VE) and virtual hole (VH) processes.<sup>S5</sup> This ensures that the quantum states irrelevant to SHG are not shown in the occupied or unoccupied “SHG-densities”, while the orbitals vital to SHG are intuitively highlighted in the real space.

**Table S1.** Selected bond distances (Å) and angles (deg) for Na<sub>5</sub>(SeO<sub>4</sub>)(HSeO<sub>4</sub>)<sub>3</sub>(H<sub>2</sub>O)<sub>2</sub>.

|                   |           |                   |           |
|-------------------|-----------|-------------------|-----------|
| Se(1)-O(2)        | 1.595(9)  | Se(1)-O(4)        | 1.597(12) |
| Se(1)-O(1)        | 1.612(11) | Se(1)-O(3)        | 1.675(11) |
| Se(2)-O(5)        | 1.608(11) | Se(2)-O(6)        | 1.618(8)  |
| Se(2)-O(7)        | 1.623(10) | Se(2)-O(8)        | 1.717(11) |
| Se(3)-O(9)        | 1.601(10) | Se(3)-O(10)       | 1.643(10) |
| Se(3)-O(11)       | 1.635(8)  | Se(3)-O(12)       | 1.685(9)  |
| Se(4)-O(15)       | 1.599(10) | Se(4)-O(14)       | 1.607(10) |
| Se(4)-O(16)       | 1.663(10) | Se(4)-O(13)       | 1.667(9)  |
| Na(1)-O(1)        | 2.410(12) | Na(1)-O(8)        | 2.475(13) |
| Na(1)-O(11)       | 2.443(10) | Na(1)-O(10)#2     | 2.399(12) |
| Na(1)-O(12)#8     | 2.403(11) | Na(1)-O(14)#5     | 2.465(12) |
| Na(2)-O(2)        | 2.601(10) | Na(2)-O(5)        | 2.389(13) |
| Na(2)-O(15)       | 2.383(12) | Na(2)-O(9)#2      | 2.342(11) |
| Na(2)-O(6)#2      | 2.378(12) | Na(2)-O(7)#8      | 2.465(12) |
| Na(3)-O(1)        | 2.391(14) | Na(3)-O(6)        | 2.418(11) |
| Na(3)-O(11)       | 2.447(10) | Na(3)-O(2)#1      | 2.341(12) |
| Na(3)-O(4)#7      | 2.513(13) | Na(3)-O(13)#1     | 2.337(12) |
| Na(4)-O(3)        | 2.532(13) | Na(4)-O(15)       | 2.455(12) |
| Na(4)-O(5)        | 2.372(12) | Na(4)-O(14)#1     | 2.433(12) |
| Na(4)-O(16)#7     | 2.444(11) | Na(4)-O(10)#6     | 2.466(12) |
| Na(5)-O(1)        | 2.843(12) | Na(5)-O(4)        | 2.455(11) |
| Na(5)-O(1W)       | 2.497(9)  | Na(5)-O(2W)       | 2.344(11) |
| Na(5)-O(1W)#7     | 2.413(8)  | Na(5)-O(2W)#3     | 2.546(12) |
| Na(5)-O(4)#7      | 2.709(11) |                   |           |
| O(2)-Se(1)-O(4)   | 109.5(5)  | O(2)-Se(1)-O(1)   | 110.4(5)  |
| O(4)-Se(1)-O(1)   | 113.3(6)  | O(2)-Se(1)-O(3)   | 111.2(6)  |
| O(4)-Se(1)-O(3)   | 107.0(5)  | O(1)-Se(1)-O(3)   | 105.4(6)  |
| O(5)-Se(2)-O(6)   | 111.6(5)  | O(5)-Se(2)-O(7)   | 111.8(6)  |
| O(6)-Se(2)-O(7)   | 118.5(5)  | O(5)-Se(2)-O(8)   | 102.2(6)  |
| O(6)-Se(2)-O(8)   | 103.6(5)  | O(7)-Se(2)-O(8)   | 107.4(6)  |
| O(9)-Se(3)-O(11)  | 113.9(5)  | O(9)-Se(3)-O(10)  | 112.0(5)  |
| O(11)-Se(3)-O(10) | 110.3(5)  | O(9)-Se(3)-O(12)  | 103.1(5)  |
| O(11)-Se(3)-O(12) | 104.7(4)  | O(10)-Se(3)-O(12) | 112.4(5)  |
| O(15)-Se(4)-O(14) | 112.3(5)  | O(15)-Se(4)-O(13) | 113.8(6)  |
| O(14)-Se(4)-O(13) | 108.0(6)  | O(15)-Se(4)-O(16) | 112.6(5)  |
| O(14)-Se(4)-O(16) | 106.8(5)  | O(13)-Se(4)-O(16) | 102.6(5)  |

Symmetry codes: #1 x, y, z-1; #2 x, y, z+1; #3 x, -y, z+1/2; #4 x, -y+1, z-1/2; #5 x+1/2, -y+1/2, z-1/2; #6 x-1/2, -y+1/2, z+1/2; #7 x, -y, z-1/2; #8 x, -y+1, z+1/2; #9 x+1/2, -y+1/2, z+1/2; #10 x-1/2, -y+1/2, z-1/2.

**Table S2.** Atomic coordinates ( $\times 10^4$ ) and equivalent isotropic displacement parameters ( $\text{\AA}^2 \times 10^3$ ) of  $\text{Na}_5(\text{SeO}_4)(\text{HSeO}_4)_3(\text{H}_2\text{O})_2$ .  $U(\text{eq})$  is defined as one third of the trace of the orthogonalized  $U_{ij}$  tensor, and the bond valence sum for each atom in asymmetric unit.

| Atom  | x        | y       | z          | $U_{\text{eq}}(\text{\AA}^2)$ | BVS  |
|-------|----------|---------|------------|-------------------------------|------|
| Se(1) | -2071(1) | 1110(1) | -3183(2)   | 16(1)                         | 6.31 |
| Se(2) | -3202(1) | 3889(1) | -6777(2)   | 15(1)                         | 5.95 |
| Se(3) | -1112(1) | 3719(1) | -9565(2)   | 9(1)                          | 6.00 |
| Se(4) | -4162(1) | 1284(1) | -406(2)    | 11(1)                         | 6.07 |
| O(1)  | -1664(7) | 1772(8) | -4592(16)  | 24(3)                         | 2.05 |
| O(2)  | -2142(5) | 1762(7) | -1315(13)  | 24(2)                         | 2.11 |
| O(3)  | -2917(6) | 817(8)  | -4531(18)  | 33(3)                         | 1.40 |
| O(4)  | -1655(6) | 55(9)   | -2508(14)  | 26(3)                         | 2.11 |
| O(5)  | -3602(7) | 3250(8) | -5329(16)  | 22(3)                         | 2.05 |
| O(6)  | -3020(5) | 3176(6) | -8499(12)  | 20(2)                         | 1.91 |
| O(7)  | -3610(6) | 4983(8) | -7353(14)  | 24(2)                         | 1.79 |
| O(8)  | -2335(6) | 4133(9) | -5343(16)  | 24(2)                         | 1.43 |
| O(9)  | -1915(5) | 4042(7) | -10833(14) | 13(2)                         | 1.96 |
| O(10) | -569(6)  | 3228(9) | -10916(15) | 20(2)                         | 1.85 |
| O(11) | -1155(5) | 2954(7) | -7753(12)  | 12(2)                         | 1.86 |
| O(12) | -772(5)  | 4825(7) | -8503(12)  | 16(2)                         | 1.49 |
| O(13) | -3353(6) | 940(8)  | 1033(16)   | 26(3)                         | 1.82 |
| O(14) | -4690(6) | 1747(8) | 939(14)    | 16(2)                         | 1.95 |
| O(15) | -4069(6) | 2047(8) | -2114(15)  | 27(3)                         | 2.09 |
| O(16) | -4533(5) | 164(7)  | -1240(12)  | 16(2)                         | 1.59 |
| O(1W) | -187(4)  | 1157(5) | -1119(12)  | 37(2)                         | 0.34 |
| O(2W) | -79(7)   | 1076(7) | -6408(19)  | 78(3)                         | 0.34 |
| Na(1) | -1055(4) | 3417(5) | -4344(10)  | 21(1)                         | 1.13 |
| Na(2) | -3090(4) | 3274(4) | -1908(11)  | 18(1)                         | 1.14 |
| Na(3) | -2181(4) | 1723(4) | -8012(11)  | 21(1)                         | 1.19 |
| Na(4) | -4199(4) | 1630(5) | -5571(10)  | 22(1)                         | 1.05 |
| Na(5) | -604(3)  | 151(3)  | -4173(7)   | 47(1)                         | 1.03 |

**Table S3.** Hydrogen-bonding interactions for  $\text{Na}_5(\text{SeO}_4)(\text{HSeO}_4)_3(\text{H}_2\text{O})_2$ .

| D—H $\cdots$ A        | $d(\text{D—H})$ | $d(\text{H}\cdots\text{A})$ | $d(\text{D}\cdots\text{A})$ | $\angle(\text{DHA})$ |
|-----------------------|-----------------|-----------------------------|-----------------------------|----------------------|
| O1—H1WA $\cdots$ O2W  | 0.8300          | 2.5300                      | 3.2800                      | 151.00               |
| O1W—H1WB $\cdots$ O10 | 0.8300          | 2.0400                      | 2.8085                      | 155.00               |
| O3—H3 $\cdots$ Se4    | 0.8200          | 2.8500                      | 3.5345                      | 142.00               |
| O3—H3 $\cdots$ O13    | 0.8200          | 1.6800                      | 2.4921                      | 170.00               |
| O2W—H2WA $\cdots$ O11 | 0.8500          | 2.3100                      | 3.1616                      | 176.00               |
| O2W—H2WB $\cdots$ O15 | 0.8800          | 2.5500                      | 3.1725                      | 128.00               |
| O8—H8 $\cdots$ Se3    | 0.8200          | 2.8600                      | 3.5568                      | 143.00               |
| O8—H8 $\cdots$ O9     | 0.8200          | 1.7700                      | 2.5522                      | 158.00               |
| O12—H12A $\cdots$ Se4 | 0.8500          | 2.7600                      | 3.5717                      | 161.00               |
| O12—H12A $\cdots$ O16 | 0.8500          | 1.6400                      | 2.4732                      | 164.00               |

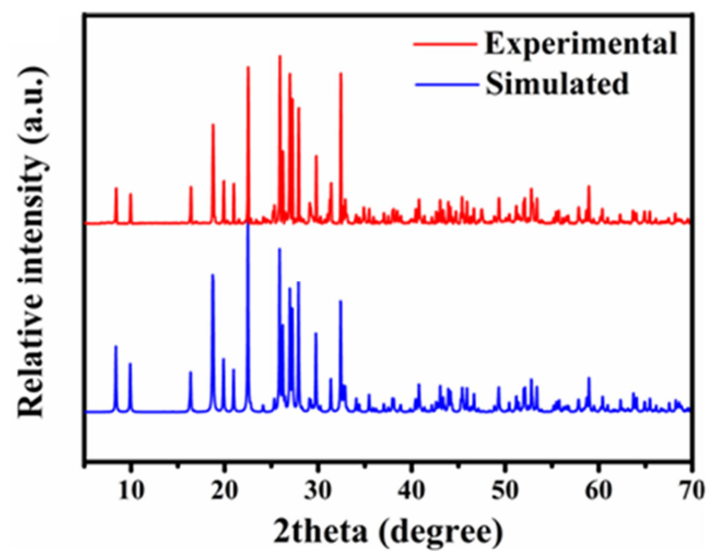

**Figure S1.** Experimental and simulated powder X-ray diffraction patterns of  $\text{Na}_5(\text{SeO}_4)(\text{HSeO}_4)_3(\text{H}_2\text{O})_2$ .

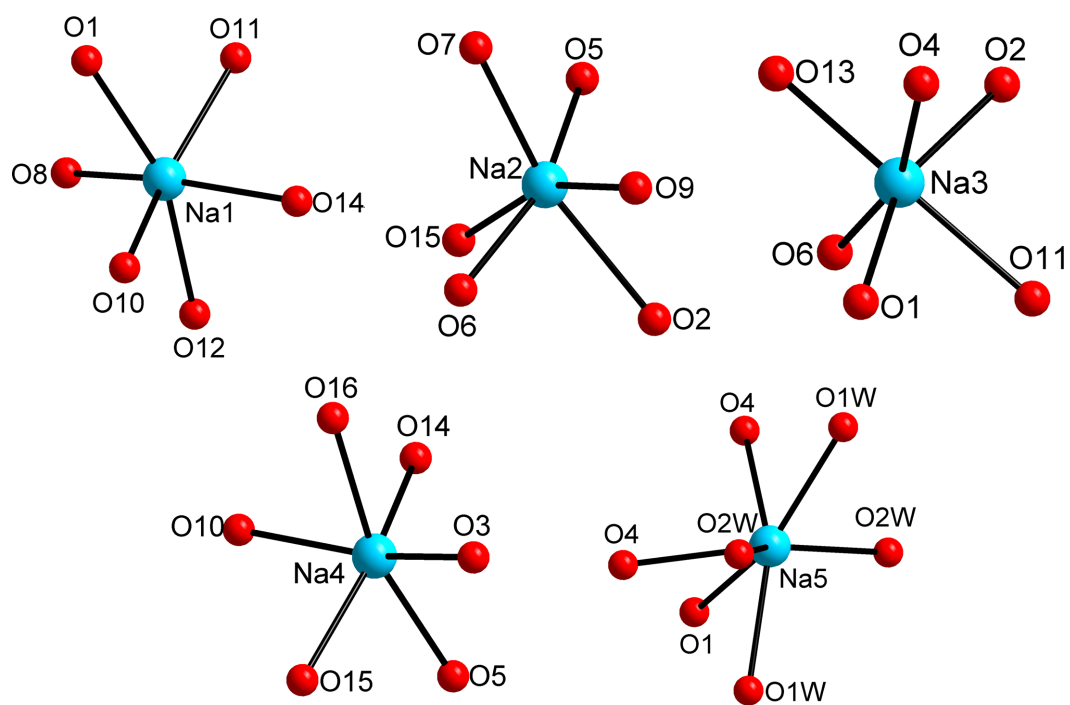

**Figure S2.** Coordination environments of the Na atoms in  $\text{Na}_5(\text{SeO}_4)(\text{HSeO}_4)_3(\text{H}_2\text{O})_2$ .



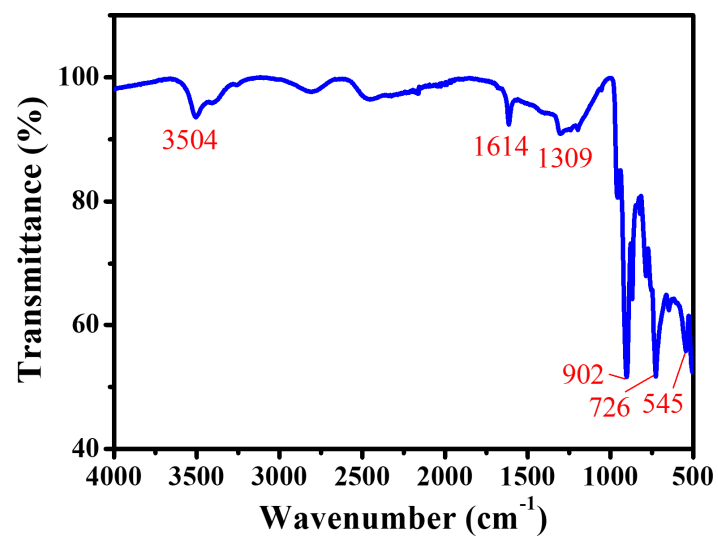

Figure S3. IR spectrum of  $\text{Na}_5(\text{SeO}_4)(\text{HSeO}_4)_3(\text{H}_2\text{O})_2$ .

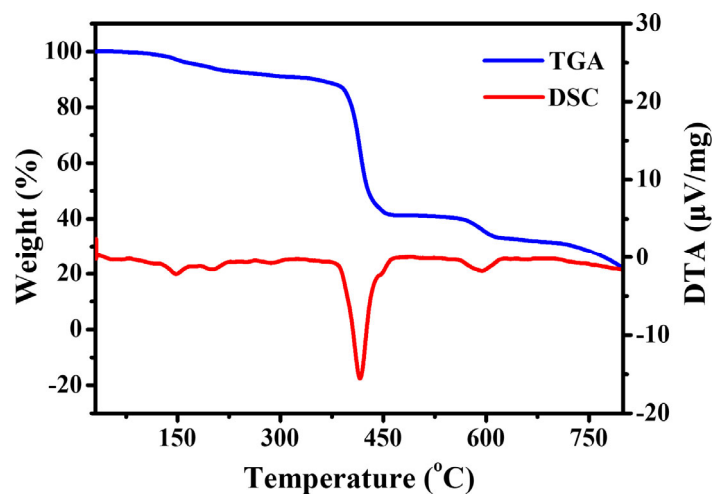

**Figure S4.** Thermogravimetric analyses of  $\text{Na}_5(\text{SeO}_4)(\text{HSeO}_4)_3(\text{H}_2\text{O})_2$  under a  $\text{N}_2$  atmosphere.

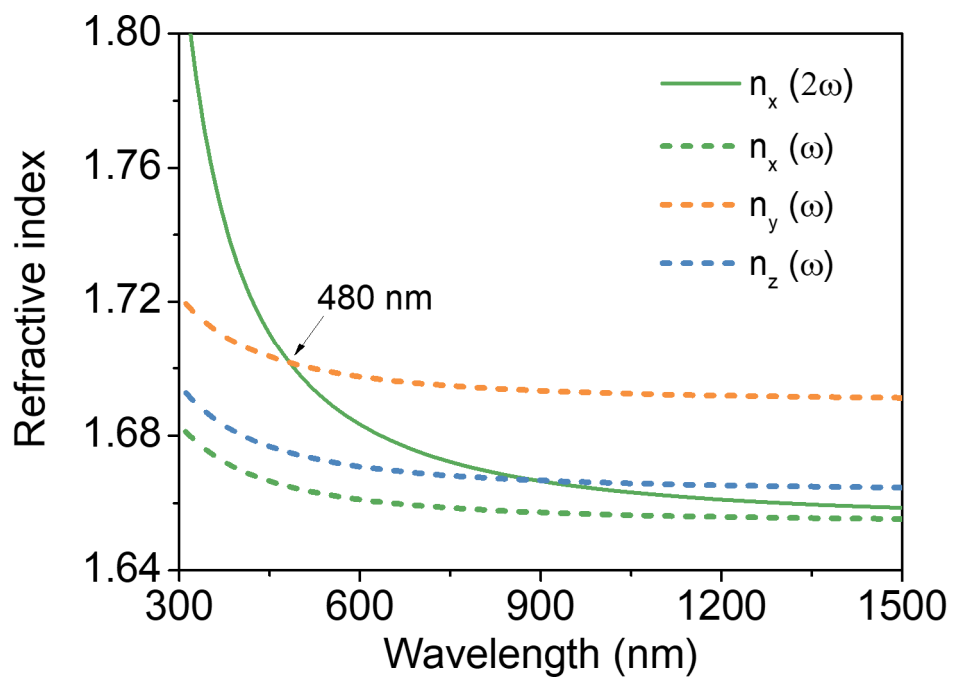

**Figure S5.** Calculated refractive index and phase-matching ability in  $\text{Na}_5(\text{SeO}_4)(\text{HSeO}_4)_3(\text{H}_2\text{O})_2$ .

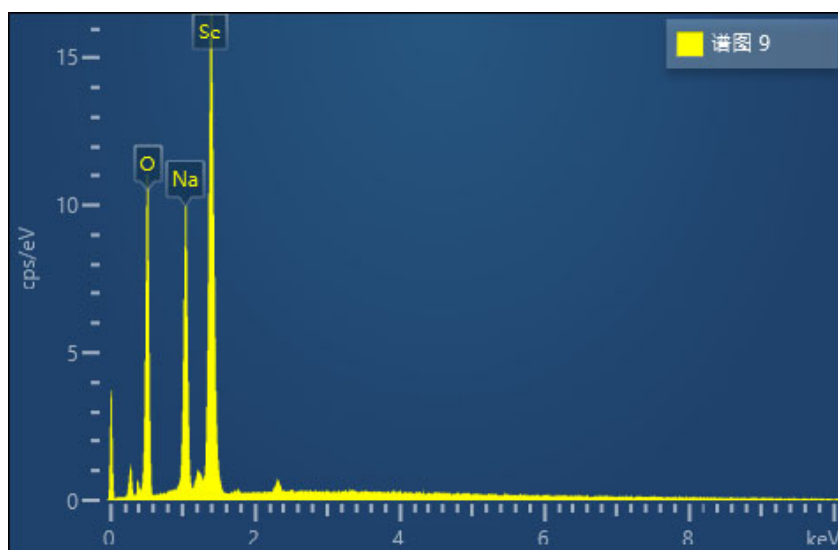

**Figure S6.** Energy dispersive spectroscopy result of  $\text{Na}_5(\text{SeO}_4)(\text{HSeO}_4)_3(\text{H}_2\text{O})_2$ .

## References

- (S1) R. W. Godby, M. Schlüter and L. J. Sham, *Phys. Rev. B: Condens. Matter Mater. Phys.*, 1988, **37**, 10159–10175.
- (S2) E. D. Palik, *Handbook of Optical Constants of Solids*; Academic: New York, 1985. (S3) Z. S. Lin, X. X. Jiang, L. Kang, P. F. Gong, S. Luo and M. H. Lee, *J. Phys. D: Appl. Phys.*, 2014, **47**, 253001.
- (S4) J. Lin, M. H. Lee, Z. P. Liu, C. Chen and C. J. Pickard, *Phys. Rev. B: Condens. Matter Mater. Phys.*, 1999, **60**, 13380–13389.
- (S5) M. H. Lee, C. H. Yang and J. H. Jan, *Phys. Rev. B: Condens. Matter Mater. Phys.*, 2004, **70**, 235110.
